# Supplementary material for: Metabolic Flexibility in Canine Mammary Tumors: Implications of the Carnitine System
Source: MDPI journal article supplement (doi:10.3390/ani11102969), 2021-10-15

Full original blots used for Figure 1 A, C, and E. Each blot membrane was cut based on the standard band positions and then incubated with the appropriate antibodies.

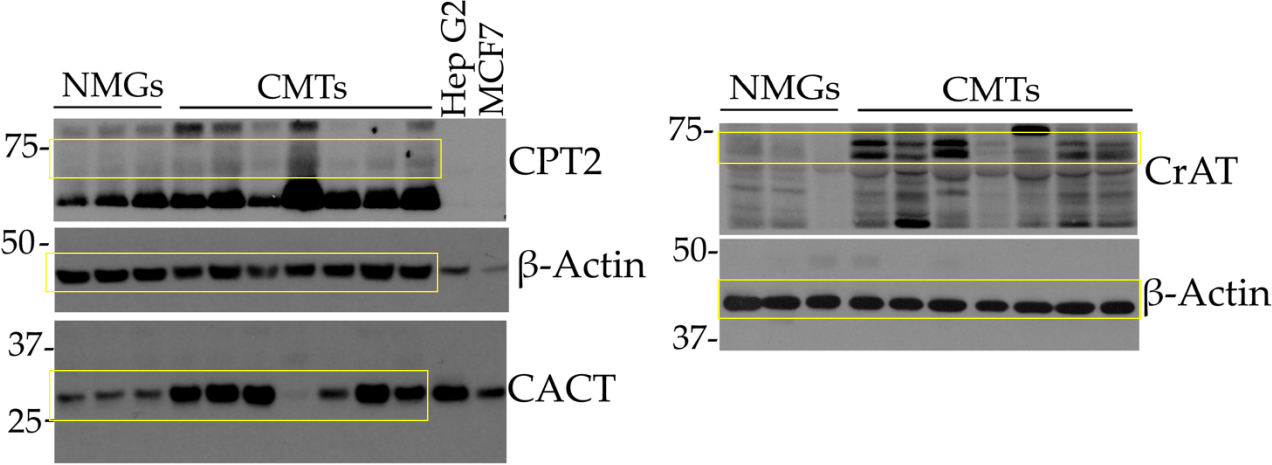

Full original blots used for Figure 1 B, D, and F. Each blot membrane was cut based on the standard band positions and then incubated with the appropriate antibodies.

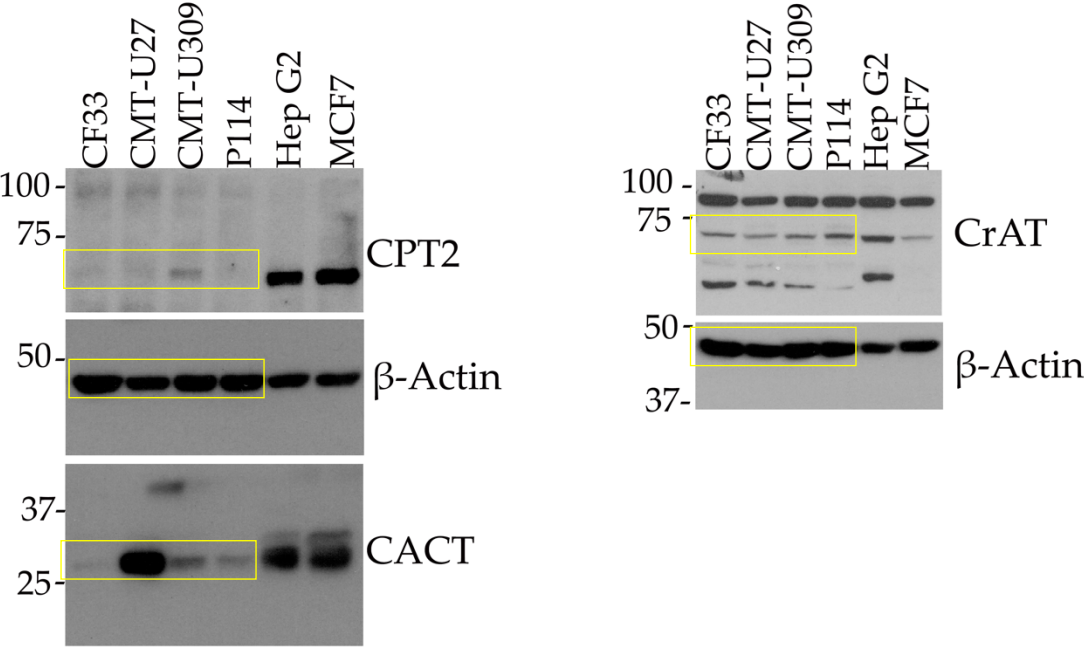

Supplement: s1 [file s1]
